# Supplementary material
Source: PubMed Central journal article supplement (PMC4047470)
Supplement: supp_M113.033902_mcp.M113.033902-1.pdf [file supp_M113.033902_mcp.M113.033902-1.pdf]

Supplementary Data for

**Controlling for gene expression changes in transcription factor protein networks.**

Charles A. S. Banks<sup>1</sup>, Zachary Lee<sup>1</sup>, Gina Boanca<sup>1</sup>, Mahadevan Lakshminarasimhan<sup>1</sup>, Brad Groppe<sup>1</sup>, Zhihui Wen<sup>1</sup>, Gaye Hattem<sup>1</sup>, Chris Seidel<sup>1</sup>, Laurence Florens<sup>1</sup>, Michael P. Washburn<sup>1,2</sup>

<sup>1</sup>Stowers Institute for Medical Research, Kansas City, MO 64110 and <sup>2</sup>Departments of Pathology & Laboratory Medicine, University of Kansas Medical Center, Kansas City, KS 66160

S1: Affinity Purification Datasets

Worksheet 1, “Halo-RelA (6 replicates)” outlines the identification of the 50 Halo-RelA associated proteins described in Figure 1B and 4A.

Worksheet 2 and 3, “FLAG-control Halo-RelA” and “FLAG-RelA 3 replicates”, outlines the analysis used for Figure 3C.

Worksheet 4, “FLAG-RelA (6 replicates)” outlines the identification of FLAG-RelA associated proteins described in figure 4A.

The peptide to spectrum match information for all analyses in Table S1 are in PSM\_Info\_SupTable1.zip.

S2: Description of Halo-RelA associated proteins

This table lists the EntrezGene summary and UniprotKB summary for the 50 Halo-RelA associated proteins described in Figure 1B

S3: Halo-RelA and FLAG RelA associated proteins defined using various control purifications.

This table repeats the analysis of RelA associated proteins with different control purifications. Rather than using cells transfected with plasmids expressing only the affinity tag, we have used cells transfected with plasmids expressing an unrelated tagged transcription factor.

S4: Coupled dNSAF values and RNA Seq FPKM values

Analysis of distribution of FPKM values described in Figure 3B

The peptide to spectrum match information for all analyses in Table S4 are in PSM\_Info\_SuppTable4.zip.

S5: Alternative transcription factor control affinity purifications

This table again summarizes the data associated with Figure 3C. In addition are the results of 4 follow up experiments similar to the experiment of Figure 3C, but using alternative transcription factors as bait.

The peptide to spectrum match information for all analyses in Table S5 are in PSM\_Info\_SuppTable5.zip.
